# Supplementary material
Source: Springer Nature journal article supplement (https://www.springermedizin.de/resource/supplementary/12958_2012_1008_MOESM2_ESM.pdf/9566562)

**Periovulatory Phase**

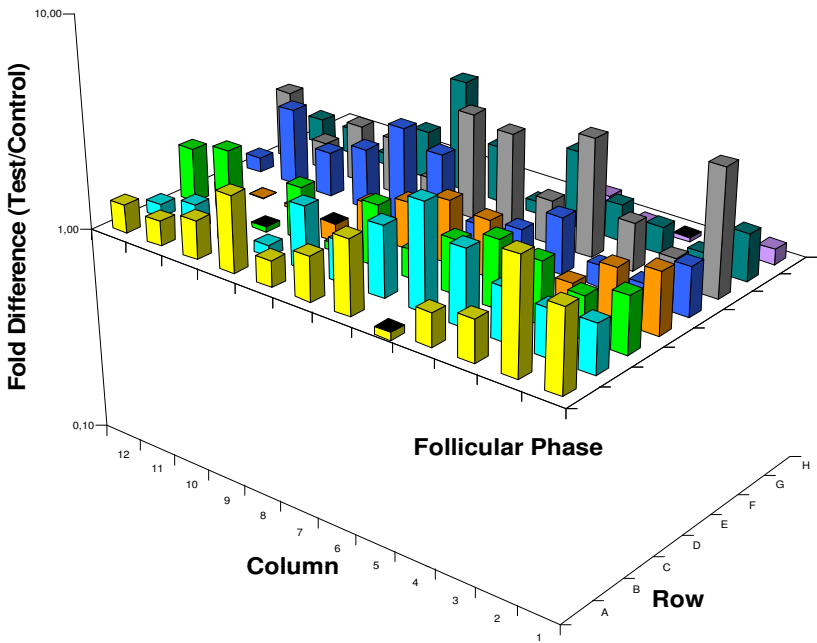

**Luteal Phase**

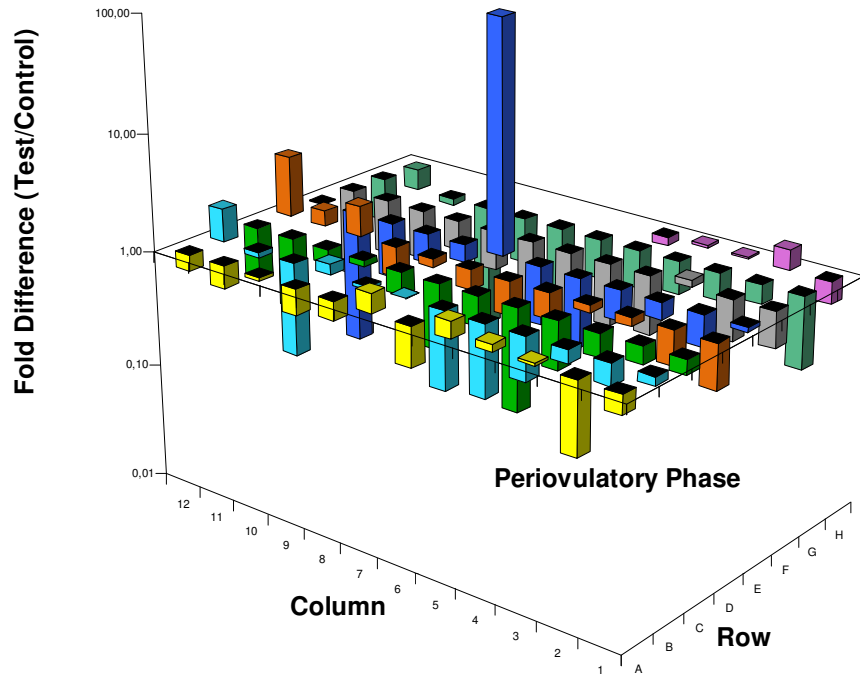

**Estrogen**

**Progesterone**

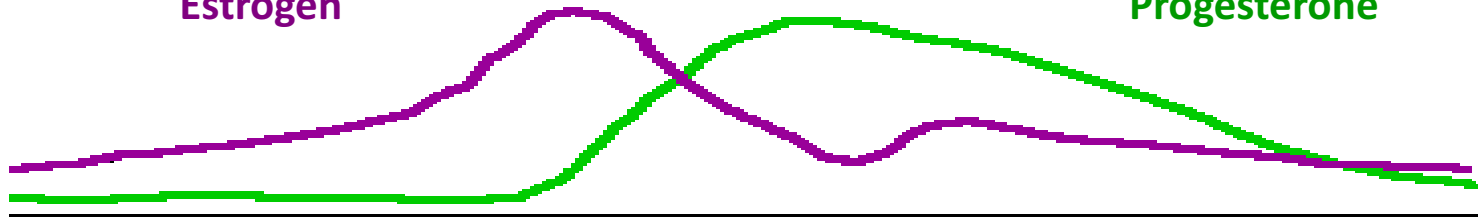

Supplement: MOESM2 [file 9566562]
